# Supplementary material for: Cascade-amplifying synergistic effects of chemo-photodynamic therapy using ROS-responsive polymeric nanocarriers
Source: PubMed Central journal article supplement — Theranostics. 2018 Apr 18;8(11):2939–53. doi: 10.7150/thno.24015 (PMC5996363; doi:10.7150/thno.24015), 2018-04-18
Supplement: thnov08p2939s1.pdf [file thnov08p2939s1.pdf]

# Cascade amplifying synergistic effects of chemo-photodynamic therapy using ROS-responsive polymeric nanocarriers

Chun-Yang Sun<sup>1,†</sup>, Ziyang Cao<sup>2,†</sup>, Xue-Jun Zhang<sup>3</sup>, Rong Sun<sup>4</sup>, Chun-Shui Yu<sup>1,\*</sup>, and Xianzhu Yang<sup>2,\*</sup>

<sup>1</sup> Department of Radiology and Tianjin Key Laboratory of Functional Imaging, Tianjin Medical University General Hospital, Tianjin 300052, P.R. China

<sup>2</sup> Institutes for Life Sciences, School of Medicine and National Engineering Research Center for Tissue Restoration and Reconstruction, South China University of Technology, Guangzhou, Guandong 510006, P. R. China

<sup>3</sup> School of Medical Imaging, Tianjin Medical University, Tianjin 300203, P.R. China

<sup>4</sup> School of Biological and Chemical Engineering, Zhejiang University of Science & Technology, Hangzhou, Zhejiang 310023, P. R. China

<sup>†</sup> These authors contributed equally.

E-mail: chunshuiyu@tjmu.edu.cn (C. S. Yu), yangxz@scut.edu.cn (X. Z. Yang)

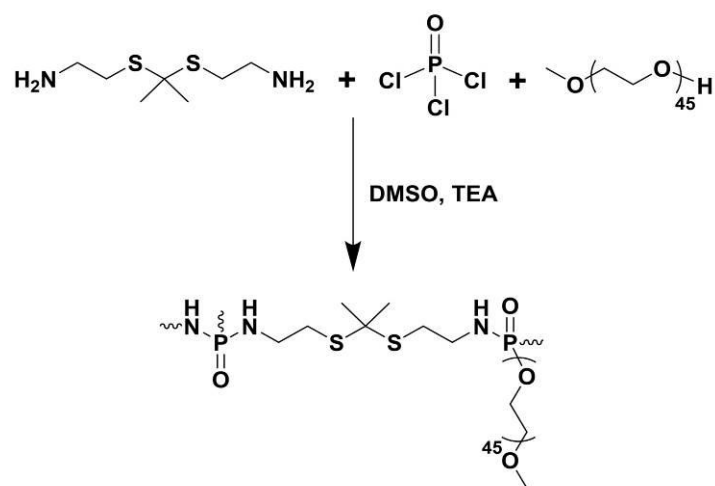

**Figure S1.** Synthetic route of hyperbranched polyphosphate (RHPPE).

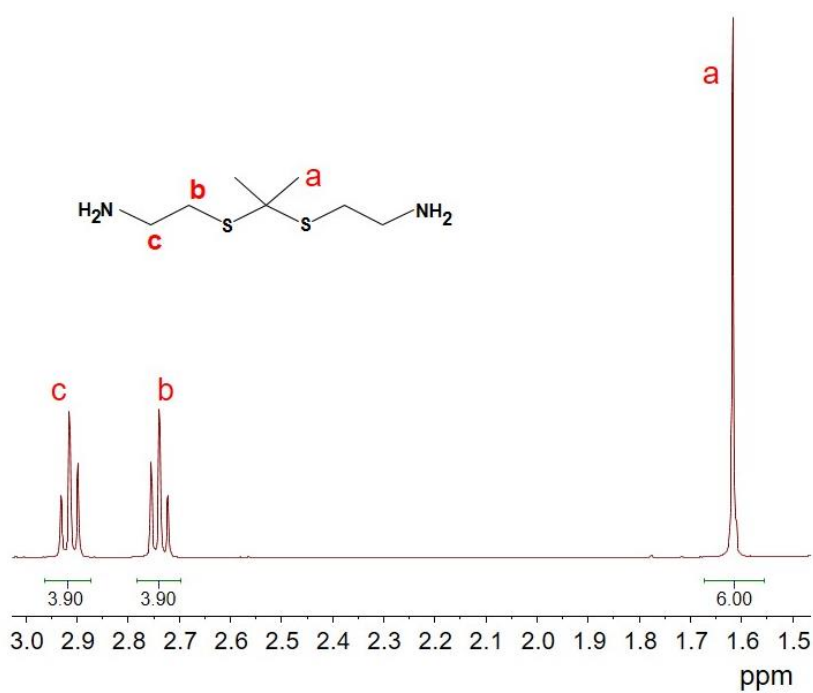

**Figure S2.** <sup>1</sup>H NMR spectrum of RHPPE in CDCl<sub>3</sub> recorded on an AVANCE III 400 MHz spectrometer at 25 °C (ppm).

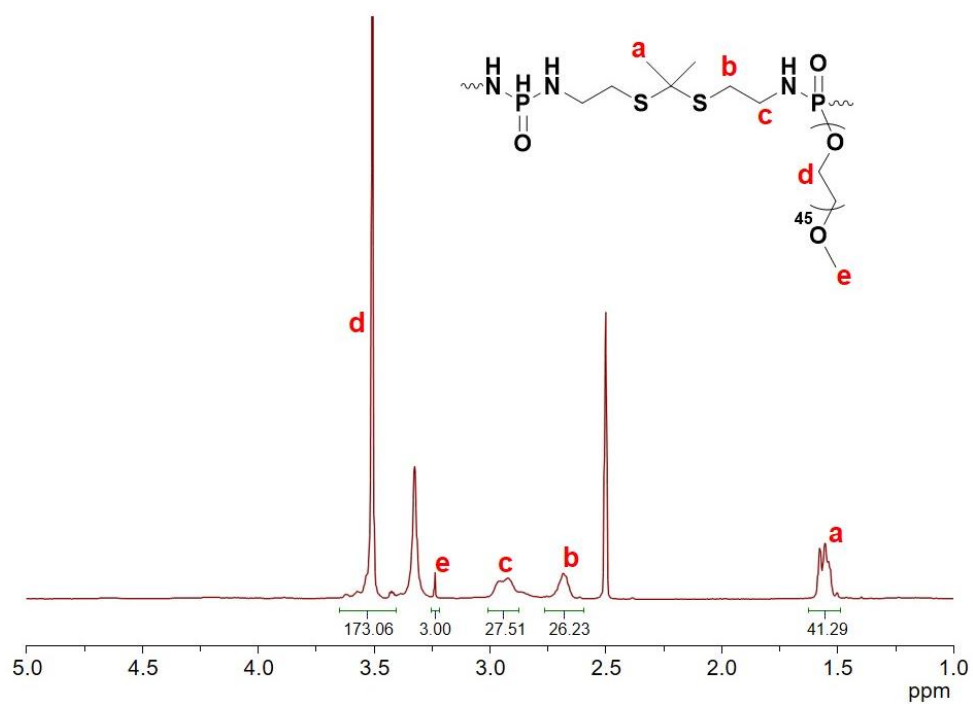

**Figure S3.**  $^1\text{H}$  NMR spectrum of RHPPE in  $d_6$ -DMSO recorded on an AVANCE III 400 MHz spectrometer at 25  $^\circ\text{C}$ .

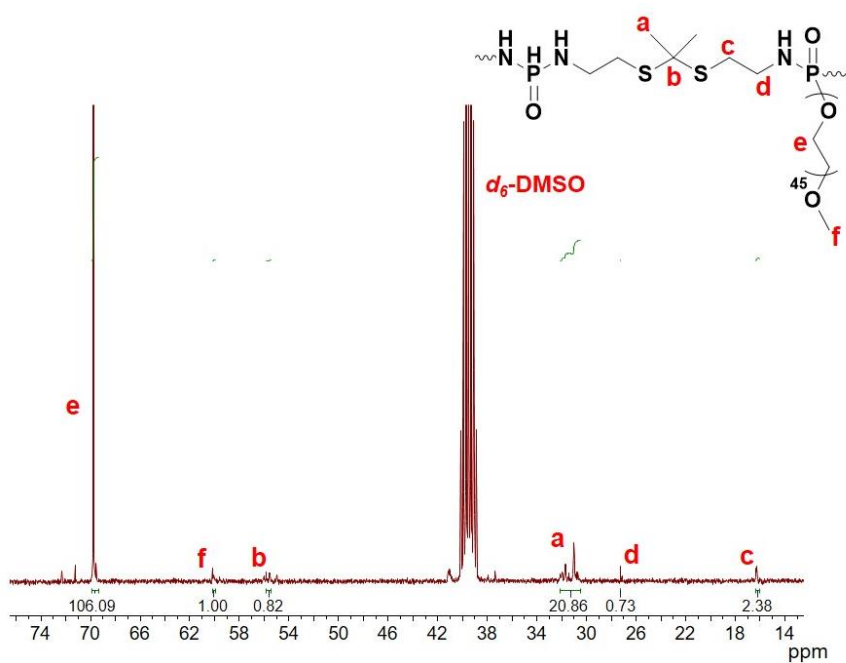

**Figure S4.**  $^{13}\text{C}$  NMR spectrum of RHPPE in  $d_6$ -DMSO recorded on an AVANCE III 400 MHz spectrometer at 25  $^\circ\text{C}$ .

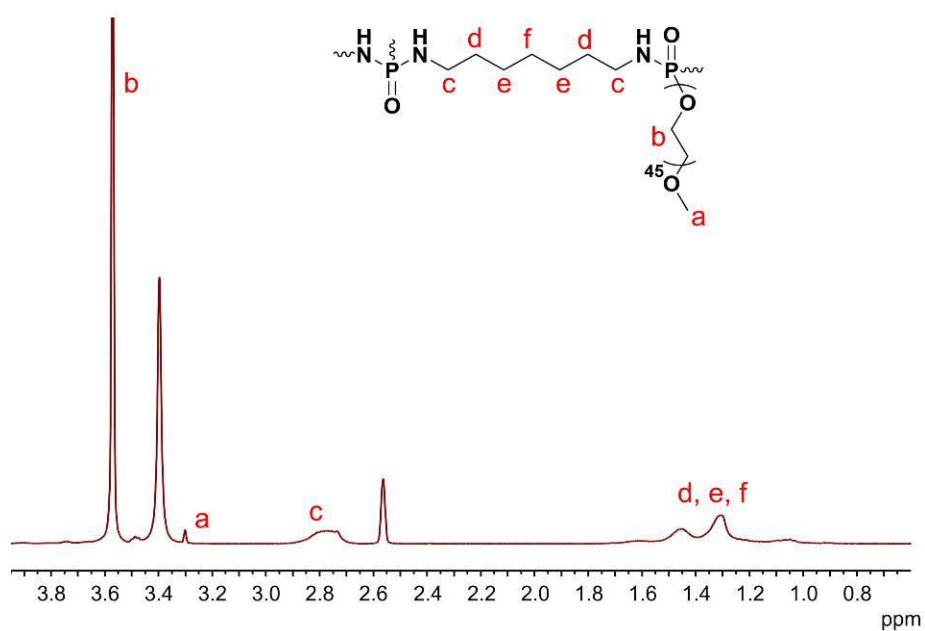

**Figure S5.**  $^1\text{H}$  NMR spectrum of non-responsive hyperbranched polyphosphate (HPPE) in  $d_6$ -DMSO recorded on an AVANCE III 400 MHz spectrometer at 25  $^\circ\text{C}$ .

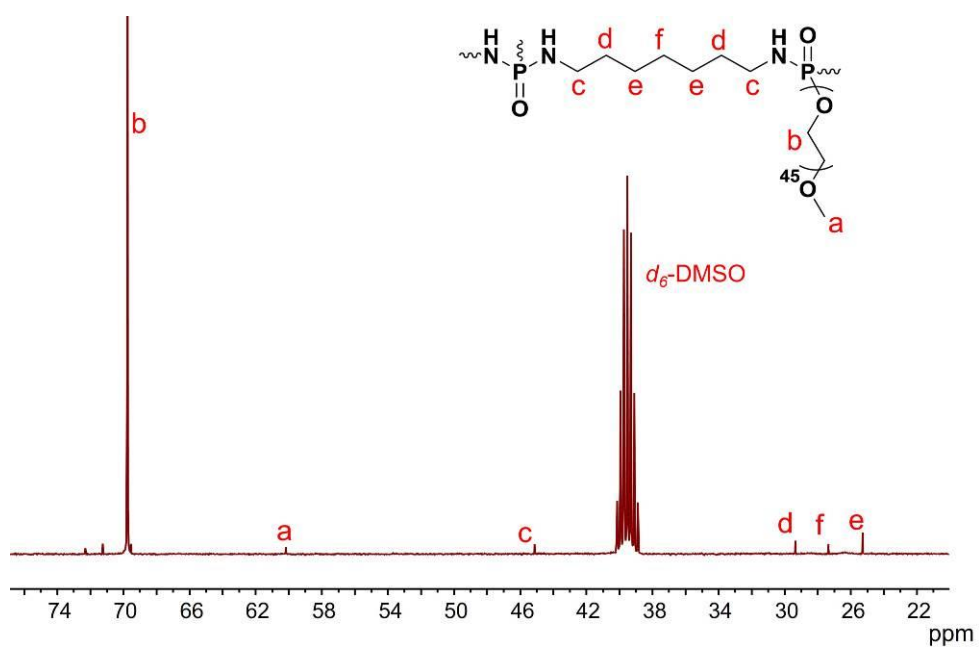

**Figure S6.**  $^{13}\text{C}$  NMR spectrum of HPPE in  $\text{CDCl}_3$  recorded on an AVANCE III 400 MHz spectrometer at 25  $^\circ\text{C}$ .

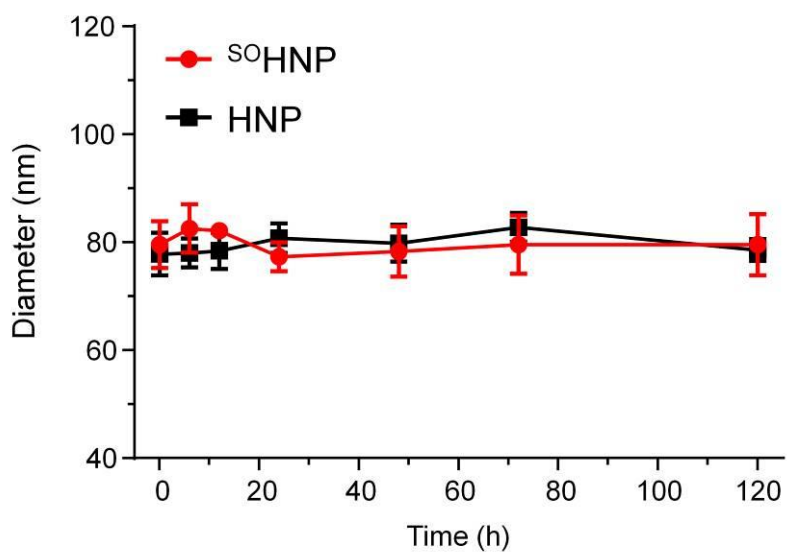

**Figure S7.** Diameter changes of  $^{SO}HNP$  or HNP as a function of incubation time in PB buffer (pH 7.4).

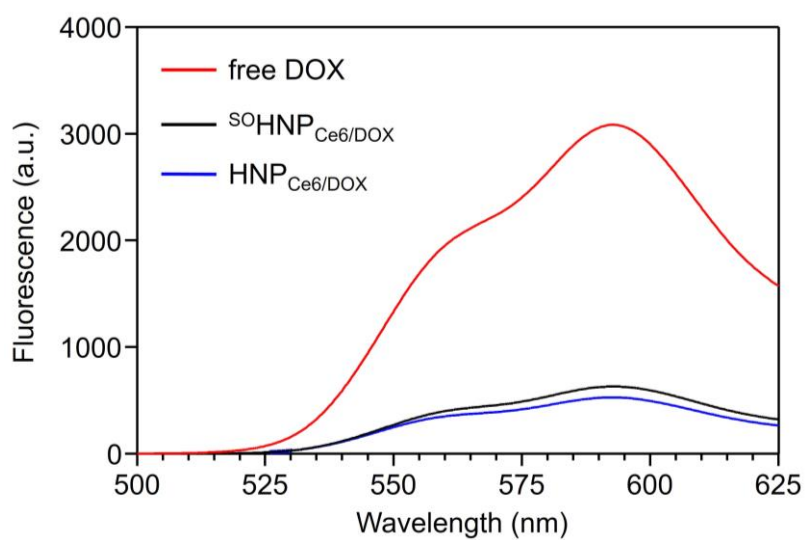

**Figure S8.** Emission spectra of free DOX,  $^{SO}HNP_{Ce6/DOX}$  or  $HNP_{Ce6/DOX}$  in aqueous solution (Ex=460 nm).

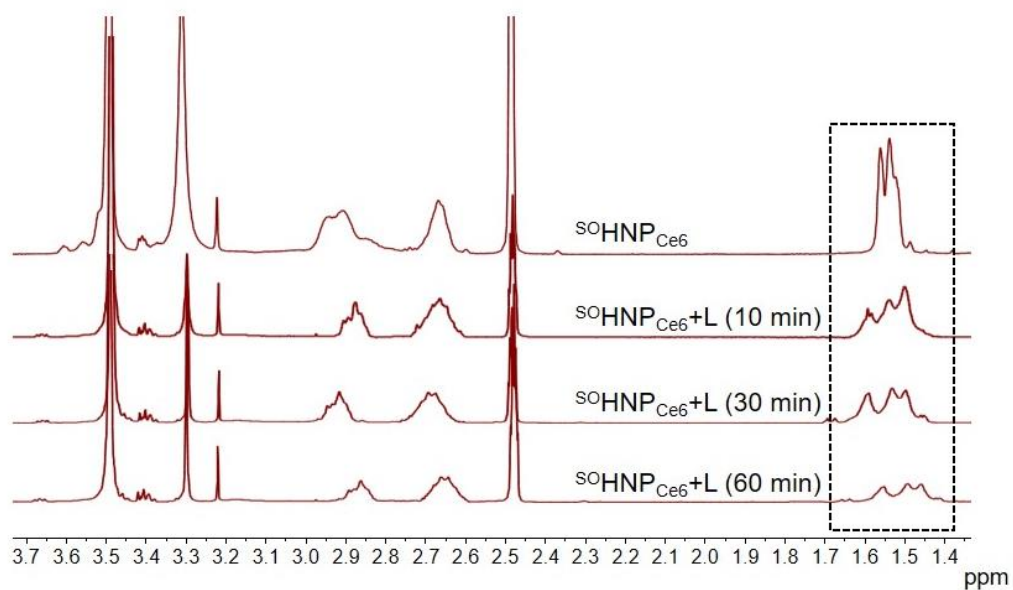

**Figure S9.**  $^1\text{H}$  NMR spectra of  $^{\text{SO}}\text{HNP}_{\text{Ce6}}$  after 660 nm laser irradiation for different times (10, 30, and 60 min) at power intensity of  $0.2 \text{ W/cm}^2$ .

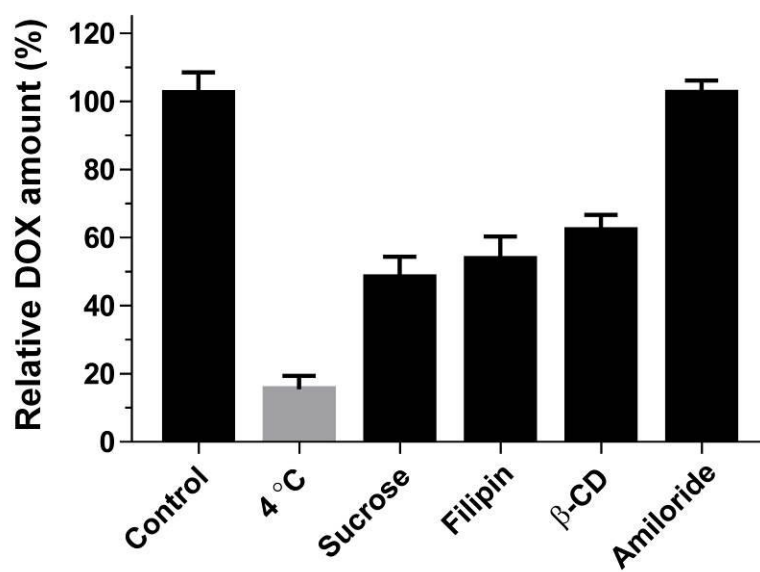

**Figure S10.** Cellular amount of DOX in MCF-7/ADR cells after 6 h of incubation with  $^{\text{SO}}\text{HNP}_{\text{Ce6}}/\text{DOX}$ .

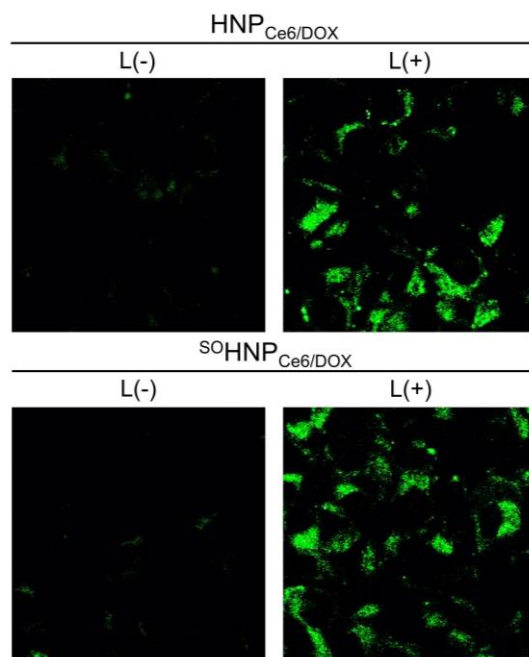

**Figure S11.** Fluorescence microscopy image of cells incubated with DCF-DA and then treated with  $\text{HNP}_{\text{Ce6/DOX}}$  and  $\text{SOHNP}_{\text{Ce6/DOX}}$  with or without 660 nm laser irradiation ( $0.2 \text{ W/cm}^2$ , 15 min).

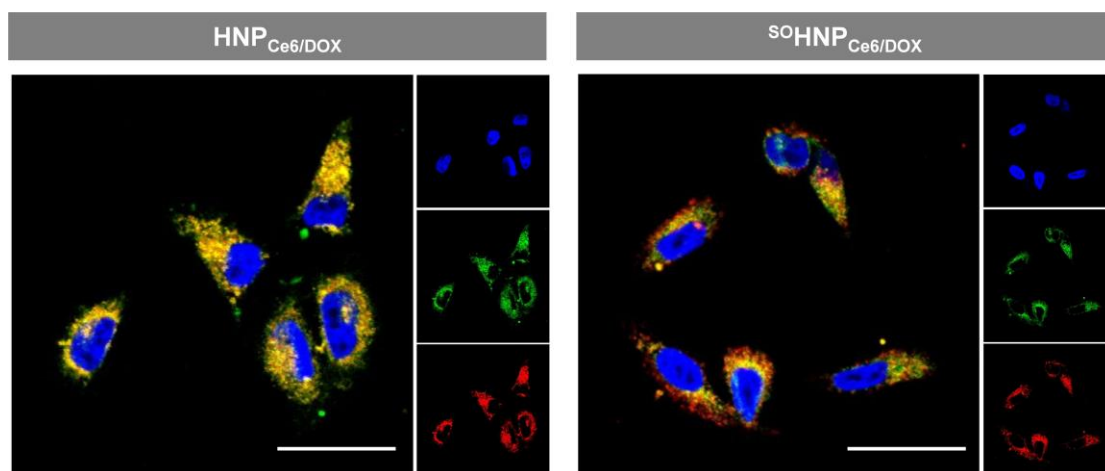

**Figure S12.** Assessment of the intracellular DOX release and biodistribution of  $\text{HNP}_{\text{Ce6/DOX}}$  or  $\text{SOHNP}_{\text{Ce6/DOX}}$  in MCF-7/ADR cells without continuous 660-laser irradiation ( $0.1 \text{ W/cm}^2$ ). The concentration of DOX in the cell culture was  $6 \mu\text{g/mL}$ . Acidic endosomes/lysosomes and cell nuclei were stained with LysoTracker<sup>TM</sup> Green

(green) and DAPI (blue), respectively.

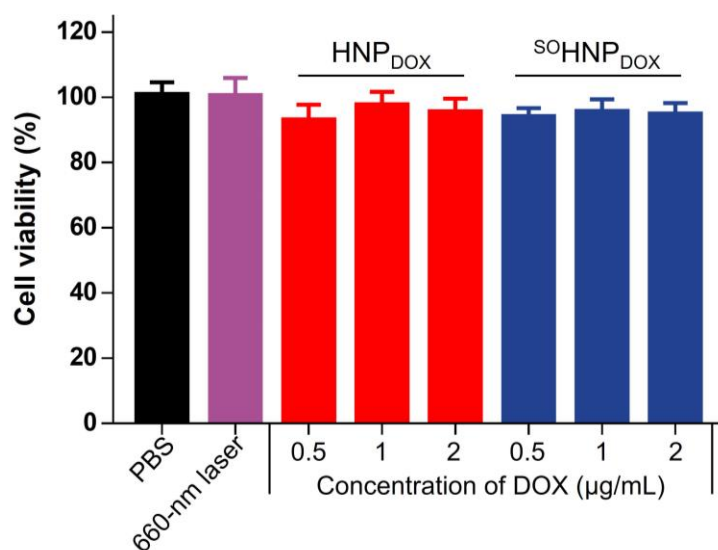

**Figure S13.** Cytotoxicity of laser, HNP<sub>DOX</sub> and <sup>SO</sup>HNP<sub>DOX</sub> against MCF-7/ADR cells for 72 h. The power density of 660-nm laser (NIR) was 0.1 W/cm<sup>2</sup>.

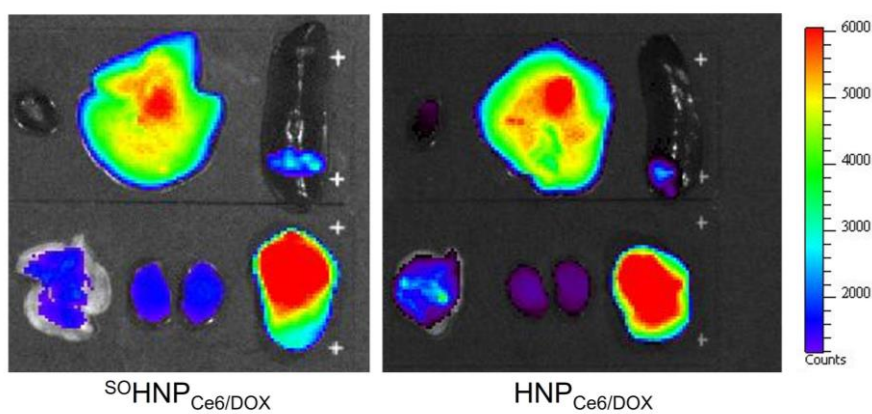

**Figure S14.** Fluorescence image of Ce6 in major organs 24 h post systemic injection. The quantification of fluorescence intensity calculated by the software is shown in Figure 6C and 6D.

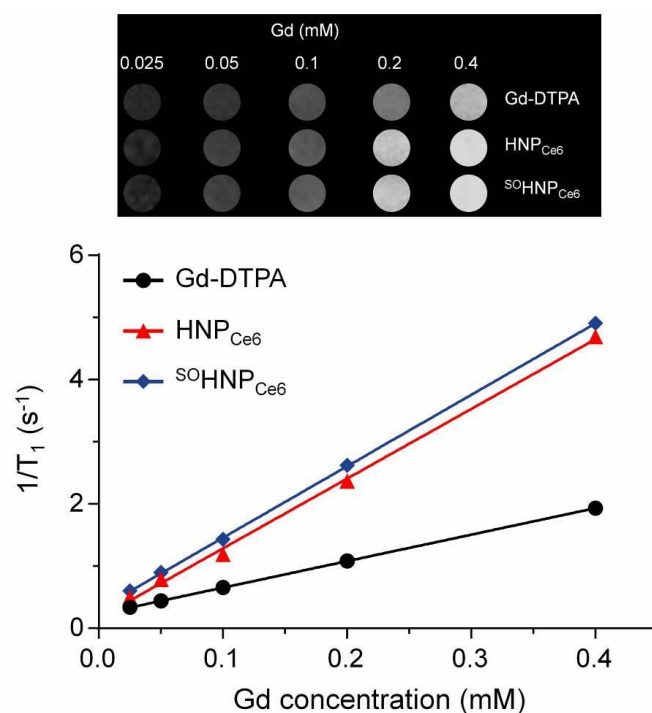

**Figure S15.** Water proton longitudinal relaxation rate ( $1/T_1$ ) of HNP<sub>Ce6</sub> and SOHNP<sub>Ce6</sub> in aqueous solution as a function of Gd<sup>3+</sup> concentration. The small molecular Gd-DTPA complex was used as a control.

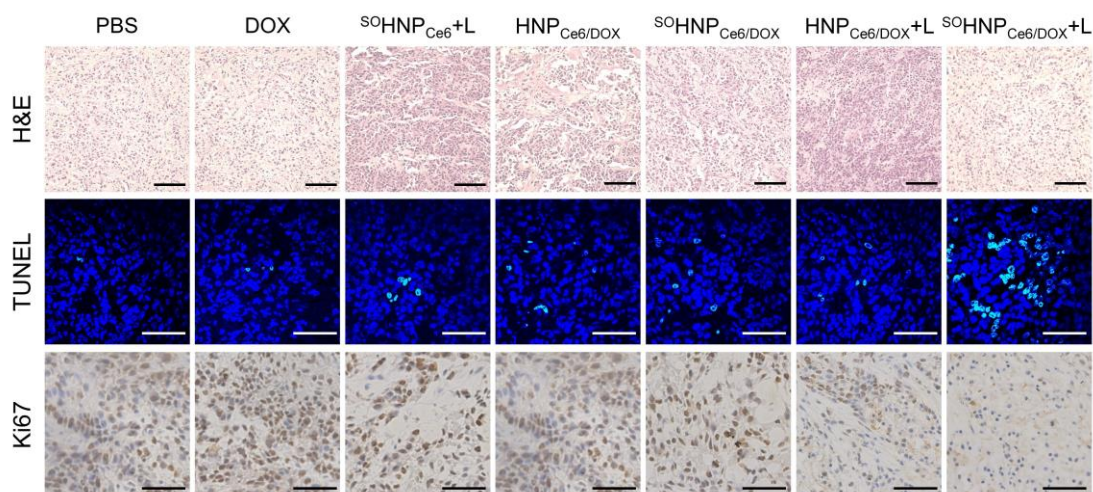

**Figure S16.** H&E, TUNEL and Ki67 analyses of tumor tissues from mice treated with the indicated formulations. The scale bar for H&E analyses was 200  $\mu$ m. The scale bar for both TUNEL and Ki67 was 100  $\mu$ m. Ki67-positive proliferating cells are stained brown.

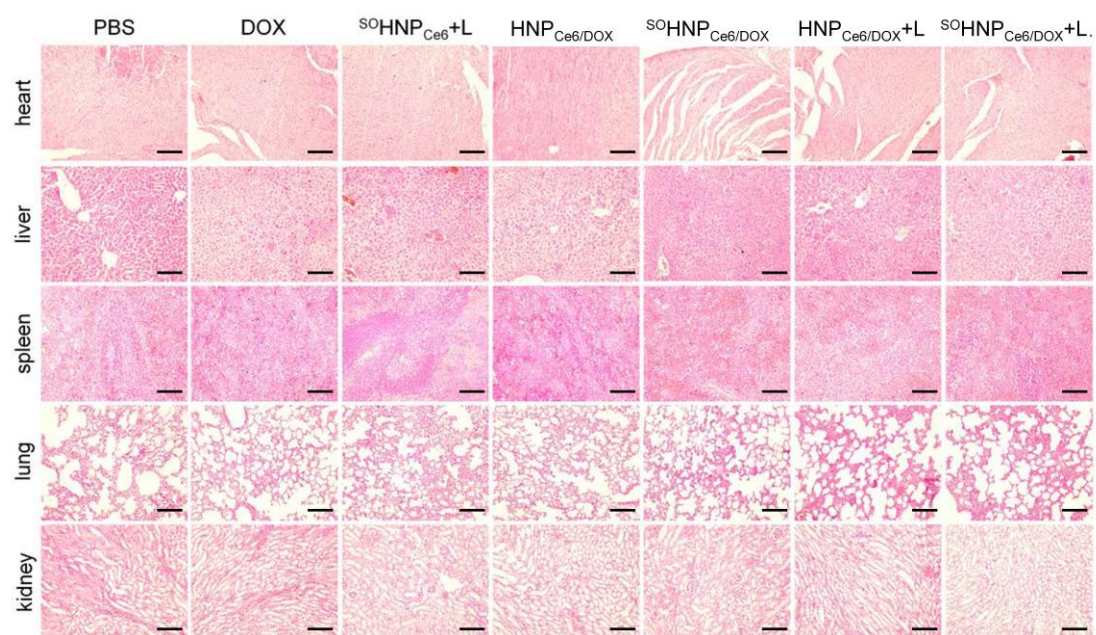

**Figure S17.** Histopathology analyses of visceral organ sections from MCF-7/ADR xenografted female mice after the tumor growth inhibition experiment (scale bar: 200 μm).

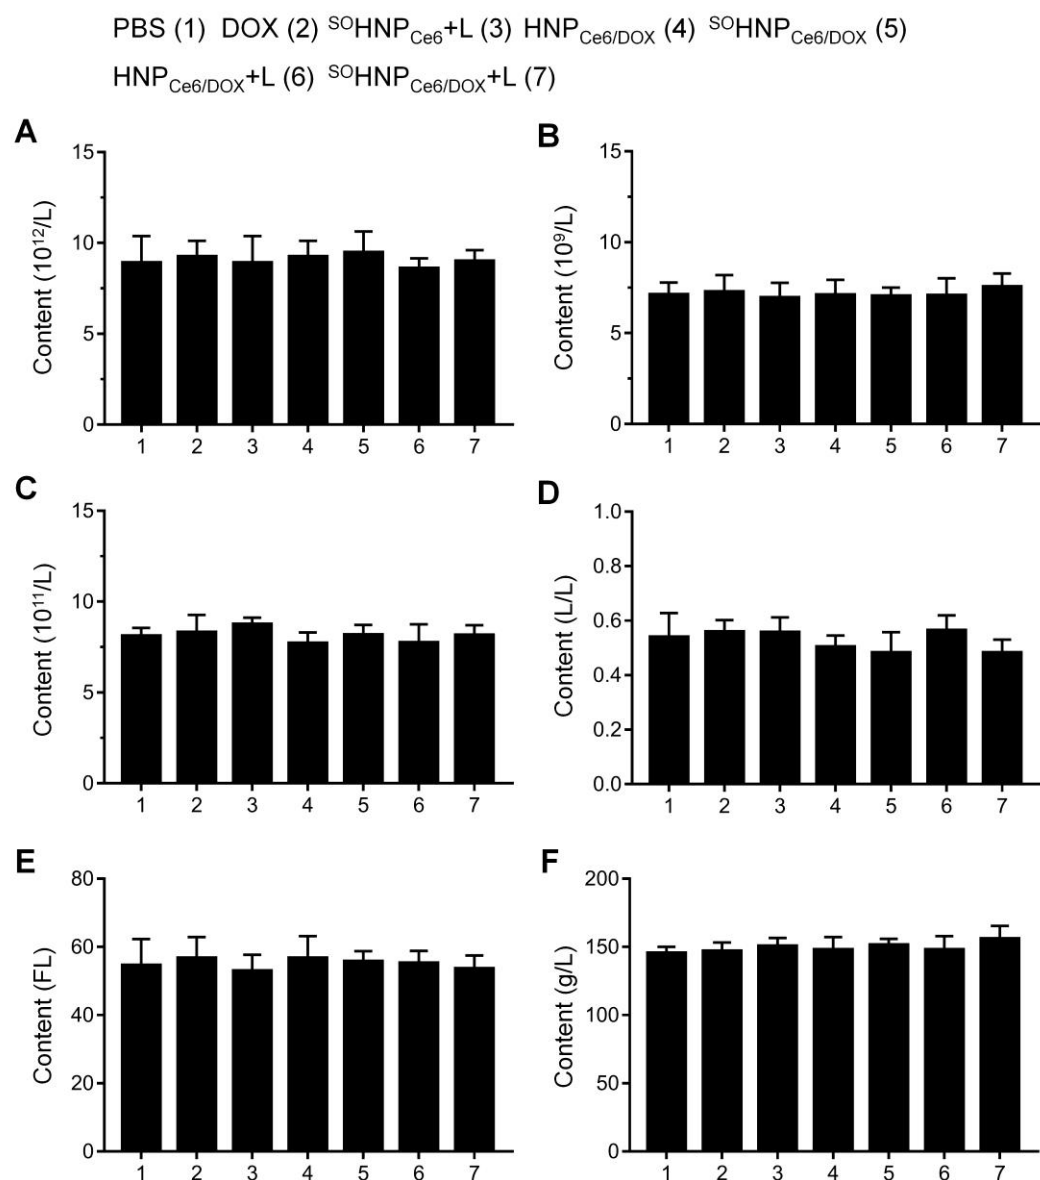

**Figure S18.** Hematology analysis of the mice after different treatments: (A) red blood cell (RBC), (B) white blood cell (WBC), (C) platelet (PLT), (D) hematocrit (HCT), (E) mean corpuscular volume (MCV), and (F) hemoglobin (HGB), respectively.

**Table S1.** Drug loading content (DLC) and encapsulation efficiency (EE) of Ce6 and DOX for <sup>SO</sup>HNP and HNP.

| Parameter                            | DLC (%) |      | EE (%) |      |
|--------------------------------------|---------|------|--------|------|
|                                      | Ce6     | DOX  | Ce6    | DOX  |
| HNP <sub>Ce6/DOX</sub>               | 3.51    | 3.27 | 35.1   | 32.7 |
| <sup>SO</sup> HNP <sub>Ce6/DOX</sub> | 3.39    | 3.13 | 33.9   | 31.3 |

**Table S2.** Pharmacokinetic parameters of these formulations after intravenous administration.

| Parameter                            | AUC <sub>0-48h</sub> (μg/L*h) | t <sub>1/2z</sub> (h) | C <sub>max</sub> (μg/L) | CI    |
|--------------------------------------|-------------------------------|-----------------------|-------------------------|-------|
| DOX                                  | 64.70                         | 18.46                 | 14.15                   | 21.53 |
| HNP <sub>Ce6/DOX</sub>               | 810.79                        | 26.47                 | 124.77                  | 1.64  |
| <sup>SO</sup> HNP <sub>Ce6/DOX</sub> | 728.83                        | 27.74                 | 140.84                  | 2.82  |

AUC, area under curve; t<sub>1/2z</sub>, elimination half-life; C<sub>max</sub>, peak concentration; CI, clear rate.
